# Supplementary material
Source: Research Square preprint supplement (doi:10.21203/rs.3.rs-9597472/v1)
Supplement: Supplementary file 1 [file 1cd06cdcbdd2aad85ca9d117.pdf]

1 **Supplementary Information for**

2  
3 **Foliar Graphene Sensor for Continuous, Non-Destructive Monitoring of Plant Tissue**  
4 **Hydration, Drought Stress and Circadian Rhythm**

5 Ning Liu<sup>1</sup>, Pascal Mahukpe Ayelo<sup>2,\*</sup>, Utkarsh Misra<sup>1,\*</sup>, Maria Lynn Ulatowski<sup>3</sup>, Caixing Xiong<sup>2</sup>,  
6 Neelotpala Kumar<sup>1</sup>, Michael Kolomiets<sup>2</sup>, Henry Fadamiro<sup>2</sup>, Jean Anne Incorvia<sup>1</sup>, Ashley M.  
7 Matheny<sup>3</sup>, Dmitry Kireev<sup>4,&</sup>, and Deji Akinwande<sup>1,5,&</sup>

8 <sup>1</sup> Department of Electrical and Computer Engineering, University of Texas at Austin, Austin,  
9 Texas 78712, USA

10 <sup>2</sup> Department of Entomology, Texas A&M University, College Station, TX 77843

11 <sup>3</sup> Department of Earth and Planetary Sciences, The University of Texas at Austin, Austin, Texas  
12 78712, USA

13 <sup>4</sup> Department of Biomedical Engineering, University of Massachusetts Amherst, Amherst, MA  
14 01002, USA

15 <sup>5</sup> Department of Biomedical Engineering, University of Texas at Austin, Austin, Texas 78712,  
16 USA

17  
18 \* These authors contributed equally

19 & Corresponding authors: [deji@ece.utexas.edu](mailto:deji@ece.utexas.edu) and [dkireev@umass.edu](mailto:dkireev@umass.edu)

## 20 **Supplementary Note 1. Comparison of Plant Water Content Monitoring Techniques**

21 Accurate measurement of plant water status is essential for understanding plant physiology  
22 and improving irrigation management. Traditionally, leaf water content (LWC) has been quantified  
23 using destructive gravimetric methods, in which leaves are excised and dried to determine water  
24 loss. Although highly accurate, such approaches cannot provide continuous measurements and are  
25 unsuitable for in situ monitoring in natural environments.

26 To address this limitation, recent studies have developed field-deployable sensors that  
27 estimate plant hydration indirectly by measuring environmental parameters near the leaf surface,  
28 such as relative humidity or vapor pressure deficit, using resistance-, capacitance-, or  
29 voltage-based sensors<sup>1-3</sup>. Even though these sensors provide a good estimate of tangential  
30 hydration features such as relative humidity, they typically infer leaf hydration indirectly from  
31 surrounding microclimate conditions rather than measuring the internal water status of the leaf  
32 itself. In addition to the derived measurements, many of these systems utilize graphene oxide  
33 (GO)<sup>1,4-6</sup> or laser-induced graphene (LIG) films as the sensing material (Table S1)<sup>3,7</sup>. Because  
34 these sensors are intended for field deployment, minimizing interference with natural leaf  
35 physiology is essential. However, many reported designs, particularly those based on GO or LIG  
36 films, partially block light transmission and restrict gas exchange when attached to the leaf surface,  
37 which may perturb plant physiology and limit their suitability for long-term monitoring. In  
38 addition, most reported systems are configured to measure surface humidity rather than internal  
39 leaf hydration, which can introduce delays or indirect responses relative to physiological water  
40 dynamics.

41 Alternative non-contact approaches, including terahertz (THz) wave propagation and  
42 quantum cascade laser techniques, have demonstrated the ability to probe internal leaf hydration  
43 and pressure–volume relationships<sup>8,9</sup>. Although these optical methods provide valuable  
44 mechanistic insights, they typically rely on bulky and costly instrumentation and are therefore less  
45 practical for continuous in-field monitoring.

46 The foliar graphene sensor (FGS) developed in this work addresses these challenges by  
47 directly probing leaf hydration through four-probe bioimpedance measurements. In this  
48 configuration, the excitation current passes through the leaf tissue itself, enabling interrogation of  
49 internal hydration dynamics rather than relying on surface or environmental proxies. The  
50 four-probe configuration minimizes the influence of contact resistance and parasitic impedance,  
51 allowing accurate extraction of tissue impedance values<sup>10,11</sup>. Because the measurement current  
52 flows through the leaf tissue, the resulting impedance signal reflects the electrical properties of the  
53 plant tissue and therefore provides a direct indicator of leaf hydration state. In addition, the  
54 ultrathin and lightweight graphene-based sensing interface enables continuous operation for more  
55 than two weeks without restricting leaf growth, outperforming many GO- and LIG-based  
56 alternatives in both physiological compatibility and operational duration. In addition, the FGS  
57 platform can be directly deployed under natural environmental conditions. Although outdoor  
58 measurements exhibit slightly higher signal variability than controlled laboratory experiments, the  
59 raw (unfiltered) data still clearly resolve variations in hydration states and diurnal physiological  
60 dynamics (Figure 5e). Furthermore, optical techniques such as THz spectroscopy are typically

61 performed as discrete spot measurements rather than continuous monitoring. Compared with these  
62 approaches, the system presented here provides a portable, low-cost, and scalable sensing platform  
63 capable of real-time, long-term monitoring while maintaining minimal interference with plant  
64 physiology. By combining direct tissue-level hydration sensing with a mechanically compliant and  
65 wearable device architecture, the FGS platform enables practical and continuous monitoring of  
66 plant water status in both controlled and field environments.

## 67 **Supplementary Note 2. Electrode Architecture and Mechanical Integration of the Foliar**

### 68 **Graphene Sensor (FGS)**

69 Establishing a mechanically compliant and non-perturbative interface between electronic  
70 devices and living leaves presents a significant challenge due to the softness, continuous growth,  
71 and dynamic motion of plant tissues. The electrode architecture of the FGS was therefore designed  
72 to minimize mechanical stress, preserve natural leaf movement, and ensure stable electrical  
73 contact.

74 The FGS employs bilayer graphene as the sensing electrode. Although graphene possesses  
75 exceptional intrinsic mechanical strength, its atomic-scale thickness makes it mechanically fragile  
76 and difficult to handle. To provide mechanical integrity and ease of handling, an ultrathin  
77 polymethyl methacrylate (PMMA) support layer was incorporated (Figure S5). The resulting  
78 graphene–PMMA laminate forms a conformal electrode that directly interfaces with the leaf  
79 surface.

80 Electrical connection between the sensing electrode and the measurement instrumentation  
81 was achieved using ultrathin gold tape fabricated by depositing a conductive gold layer onto a  
82 flexible polymer substrate. Owing to its minimal thickness and high flexibility, the gold tape  
83 exhibits mechanical compliance comparable to the graphene–PMMA laminate, thereby  
84 minimizing stress concentration at the junction and preventing mechanical failure during leaf  
85 movement.

86 Although gold provides excellent electrical conductivity, the extremely small thickness of  
87 the gold tape leads to increases resistance over long connection lengths. To ensure reliable signal  
88 transmission while preserving flexibility, silver epoxy was used to bond the terminal end of the  
89 gold tape to an enameled copper wire, which then interfaced with the measurement instrument.

90 To minimize mechanical loading on the leaf, a 36 AWG enameled copper wire was  
91 selected due to its ultralight weight (0.116 g/m) and small diameter (0.14 mm). Conventional  
92 electrical leads and alligator clips were found to impose excessive weight, causing leaf bending  
93 and restricting natural diurnal movements, including repositioning and orientation changes. The  
94 lightweight wiring configuration enabled stable measurements while preserving natural leaf  
95 motion and physiological function.

96 To quantify the mechanical load imposed by the sensing system, the total mass of the  
97 complete setup was measured to be 0.2916 g, including four graphene sensors, four gold tape  
98 interconnects, and four connecting wires. The combined mass of the four graphene sensors alone  
99 was approximately 0.00035 g (Sartorius Entris II BCE124-1S analytical balance). For comparison,  
100 a fully hydrated fifth leaf weighed 6.218 g, indicating that the sensing system accounts for  
101 approximately 4.7% of the leaf mass. This minimal mass loading reduces gravitational bending  
102 and mechanical perturbation, ensuring unobtrusive monitoring while preserving natural leaf  
103 posture, movement, and physiological function.

104 **Supplementary Note 3. Biocompatibility and Physiological Compatibility of the Foliar**

105 **Graphene Sensor (FGS)**

106 Maintaining physiological compatibility is essential when interfacing electronic devices  
107 with living leaves, as surface coverage may disrupt gas exchange, light transmission, or local  
108 tissue function. The FGS was therefore designed to minimize interference with photosynthesis,  
109 transpiration, and cellular integrity during prolonged attachment.

110 More than 20 maize plants were evaluated using the FGS. Across all experiments, no  
111 visible chlorosis, lesions, or necrosis were observed in leaf regions covered with the FGS (Figure  
112 S1), indicating that prolonged contact does not induce observable tissue stress or damage.

113 In contrast, mild chlorosis was observed in control regions covered with a non-breathable  
114 polymer film. This response is consistent with restricted gas exchange and reduced light  
115 transmission, highlighting the importance of breathable and optically transparent interfaces for  
116 maintaining leaf physiological function.

117 The graphene sensing region is ultrathin, optically transparent, and permeable to gas  
118 exchange. However, electrical interconnection requires ultrathin gold tape, which is not permeable.  
119 To minimize potential physiological interference, the gold tape coverage area was carefully  
120 limited during device assembly. The contact area was maintained below  $4 \text{ mm} \times 12 \text{ mm}$  ( $< 0.5$   
121  $\text{cm}^2$ ), thereby minimizing obstruction of gas exchange and light exposure (Figure S1–S4).

122 After completion of measurements, the FGS was removed by gently wiping the surface  
123 with a laboratory tissue (Kimwipes™, Kimtech) moistened with deionized (DI) water, followed by  
124 careful peeling of the gold tape. Post-removal inspection revealed no visible differences between  
125 previously covered and uncovered regions. The limited gold contact area produced no observable  
126 physiological or morphological damage.

127 Together, these results demonstrate that the FGS provides a physiologically compatible  
128 interface with living leaves, enabling prolonged monitoring without compromising tissue integrity  
129 or function.

130 **Supplementary Note 4. Quantification of Leaf Color Difference (Figure 4a)**

131 To quantitatively assess potential color changes between FGS-covered and uncovered leaf  
132 regions, digital image analysis was performed to provide an objective measure of visual  
133 differences.

134 Regions of interest (ROIs) were selected using Photoshop (Adobe), excluding major veins  
135 to avoid structural artifacts. Mean RGB intensity values were extracted for both covered and  
136 uncovered regions.

137 Color difference was calculated as the Euclidean distance between the mean RGB vectors  
138 in three-dimensional color space and normalized to the maximum possible distance within the  
139 RGB color cube:

$$\Delta C = \frac{\sqrt{(R_1 - R_2)^2 + (G_1 - G_2)^2 + (B_1 - B_2)^2}}{\sqrt{3 \times 255^2}} \times 100\%$$

140 R,G,B represent the red, green, and blue intensity values of the selected regions.

141 This normalized metric provides a quantitative measure of color difference between the  
142 two regions, enabling objective evaluation of potential chlorosis or visual tissue changes.

143            **Supplementary Note 5. Extraction of Impedance Values at Target Frequencies**

144            The raw bioimpedance data consist of frequency-resolved spectra spanning 10 Hz to 100  
145 kHz, sampled at 201 logarithmically spaced frequencies. Each measurement file contains  
146 impedance values corresponding to each excitation frequency.

147            For quantitative analysis and visualization, impedance values at specific target frequencies  
148 were extracted from the full spectra. Single-frequency data were used to enable time-series  
149 analysis, statistical comparison, and tracking of hydration dynamics.

150            Target-frequency values (e.g., 1 kHz) were obtained by filtering rows corresponding to the  
151 desired excitation frequency and exporting the filtered data for subsequent analysis and plotting.

152            Data processing was performed using a custom Python script to ensure reproducibility and  
153 consistency across datasets.

154 **Supplementary Note 6. Correlation Analysis Between Impedance and Environmental**

155 **Variables**

156 To evaluate the relationship between leaf impedance dynamics and environmental  
157 conditions, correlation analysis was performed between normalized impedance changes ( $\Delta Z/Z_0$  at  
158 1 kHz) and measured environmental parameters(Figure S16).

159 The analyzed variables included light intensity, soil humidity, ambient temperature, soil  
160 electrical conductivity (EC), and relative humidity. Raw datasets were converted to numerical  
161 format and cleaned by removing missing values prior to analysis.

162 Pairwise correlations were quantified using the Pearson correlation coefficient to quantify  
163 linear relationships between impedance and environmental variables. The resulting correlation  
164 matrix was visualized as a heatmap to facilitate interpretation of multivariate relationships.

165 Correlation coefficients greater than 0.5 were considered indicative of strong positive  
166 correlation, whereas values below -0.5 were considered strongly negative. Intermediate values  
167 indicate moderate to weak associations.

168 All analyses and visualizations were performed using Python (pandas, NumPy, and  
169 Seaborn) to ensure reproducibility.

## Supplementary Note 7. Outdoor Environmental Validation

170

171            Demonstrating sensor performance under natural environmental conditions is essential for  
172 evaluating robustness beyond controlled laboratory settings. Because plants in field environments  
173 experience wind-induced motion, fluctuating radiation, and heterogeneous microclimates, outdoor  
174 measurements provide a stringent test of sensor stability and physiological relevance.

175            Outdoor impedance monitoring was conducted on a red oak (*Quercus buckleyi*) (Figure  
176 S3), a native woody species, at an experimental agricultural field on the University of Texas at  
177 Austin campus (Austin, TX, USA). Plants were exposed to ambient environmental conditions, and  
178 impedance and environmental variables were recorded following the protocol described in the  
179 main Methods.

180            Compared with controlled-environment measurements, increased signal variability was  
181 observed, reflecting wind-induced motion, environmental fluctuations, and heterogeneous  
182 radiation exposure typical of field conditions. Despite this variability, impedance dynamics  
183 remained physiologically consistent with environmental drivers, demonstrating the feasibility of  
184 outdoor monitoring and supporting cross-species deployment of the foliar graphene sensing  
185 platform.

186 **Supplementary Note 8. Hydration Recovery Dynamics and Coupling with Soil Moisture**

187 Understanding how leaf hydration responds to soil water availability is essential for  
188 interpreting plant water status and recovery dynamics. Because water transport occurs through an  
189 integrated soil–plant hydraulic continuum, linking leaf impedance measurements to soil moisture  
190 dynamics provides validation of the physiological relevance of the sensing platform.

191 Long-term in situ monitoring of maize leaves enabled quantitative characterization of plant  
192 water uptake and recovery dynamics under varying hydration states. Following irrigation, leaf  
193 impedance decreased rapidly, indicating immediate water uptake and hydraulic transport from  
194 roots to leaf tissues. This initial response typically occurred within approximately 20 minutes,  
195 reflecting rapid root–leaf hydraulic connectivity. Impedance then gradually stabilized as tissue  
196 hydration approached equilibrium (Figure S11).

197 Hydration recovery times depended strongly on drought severity. In drought-stressed  
198 plants exhibiting visible leaf curling, impedance remained elevated prior to irrigation and declined  
199 slowly during recovery, requiring nearly 24 hours to return to baseline levels. This gradual decline  
200 coincided with visible physiological recovery, including leaf unfolding and restoration of normal  
201 diurnal movement patterns. Such delayed recovery is consistent with previous studies showing  
202 that severe or prolonged drought slows restoration of leaf water status and gas exchange<sup>12–15</sup>.

203 In contrast, well-watered plants re-equilibrated much more rapidly after irrigation.  
204 Although minor impedance fluctuations occurred due to transient soil moisture variation and  
205 internal redistribution of water, impedance stabilized at a fully hydrated state within  
206 approximately 5 hours<sup>16</sup> (Figure S11). Under adequate hydration, plants typically require only tens  
207 of minutes to a few hours to re-establish water balance, consistent with established plant hydraulic  
208 behavior. Recovery time, defined as the interval between irrigation and impedance return to  
209 baseline, differed significantly between hydrated and drought-stressed plants, confirming that  
210 drought severity strongly influences rehydration kinetics (Figure S12).

211 Despite differences in recovery timescales, both drought-stressed and well-watered plants  
212 exhibited a rapid initial impedance decrease across frequencies following irrigation. In  
213 drought-stressed plants, comparable responses at low and high frequencies suggest simultaneous  
214 replenishment of extracellular and intracellular water compartments (Figure S10, S15). In  
215 well-watered plants, changes were more pronounced at higher frequencies, consistent with rapid  
216 intracellular hydration. Over subsequent hours, transient impedance fluctuations likely reflect  
217 redistribution of water between extracellular and intracellular spaces, ultimately yielding a  
218 uniform hydration profile.

219 Impedance dynamics also exhibited systematic relationships with soil humidity (Figure  
220 S13). During the active recovery phase immediately following irrigation, transient deviations from  
221 steady-state behavior were observed; therefore, recovery-phase data were excluded from curve  
222 fitting to avoid bias. The remaining data were well described by a logistic relationship ( $R^2 =$   
223 0.835), indicating nonlinear coupling between soil moisture availability and leaf hydration state.

224 This behavior reflects the integrated hydraulic pathway linking soil water availability, root uptake,  
225 and tissue hydration.

226 Together, these observations demonstrate that impedance monitoring captures hydration  
227 recovery dynamics and their coupling with soil moisture in real time. The ability to detect early  
228 dehydration and track recovery suggests a framework for irrigation management in which  
229 watering is triggered before visible stress symptoms emerge, enabling faster recovery and  
230 improved water-use efficiency (Figure S14).

## Supplementary Note 9. Hydraulic Coupling Between Sap Transport and Leaf

### Hydrodynamics

Linking leaf hydration dynamics to whole-plant water transport provides critical insight into how water is redistributed within plants. Because water movement occurs along a continuous soil–plant hydraulic pathway, simultaneous monitoring of sap transport and leaf impedance provides insight into the temporal coordination of water redistribution within the plant.

To quantify stem-level water transport, mini heat field deformation sensors (HFD) based on the design from previous research<sup>15</sup> were used to measure relative sap flux (RSF) in small plants. These mini HFD sensors enable bidirectional sap flow measurements with high temporal resolution through continuous heating and thermocouple-based temperature gradients. The design and calculation of RSF are based on commercially available sensors<sup>17–20</sup>. HFD sensors were designed in kiCad and printed on flexible PCBs (PCB gogo, Shenzhen, Guangdong, China). HFD thermocouples were connected to a datalogger (CR1000x, Campbell Scientific, Logan UT, USA), which recorded temperatures every 30 seconds and averaged them to 30-minute intervals. HFD sensors were placed on the outside of stems below the lowest branching junction. They contain a top, bottom and side thermocouple adjacent to a heating element (SMD 100 ohm resistor) that all make direct contact with the stem when attached. To convert RSF to absolute sap flow (g/h), excised stems were connected to a mass-balance hydraulic conductivity system<sup>15</sup> while a mini HFD sensor was simultaneously applied to the stem to record RSF.

Multi-day averaged diurnal profiles revealed that sap flow is primarily driven by sunlight intensity, exhibiting strong alignment with daily radiation patterns (Figure S17). This behavior reflects transpiration-driven water transport regulated by stomatal conductance and atmospheric demand.

Following irrigation events, sap flow dynamics exhibited a delayed response. Unlike soil moisture, which increases immediately after watering, sap flow peaks typically increased on the following day (Figure S18). This temporal offset indicates that sap transport responds after internal water redistribution and adjustment of transpiration demand rather than directly to soil water availability.

The direct correlation between sap flow and leaf impedance yielded a Pearson correlation coefficient of 0.289 ( $p = 3.83 \times 10^{-50}$ ). Although the correlation strength is modest ( $r \approx 0.3$ ), this is expected because sap flux is governed by multiple interacting environmental and physiological factors, including radiation, vapor pressure deficit, temperature, wind, internal hydration status, and hormonal regulation. Given this complexity, it is unlikely that any single variable fully explains sap flow variance. Thus, the observed correlation strength is reasonable, and the high statistical significance (p-value) indicates a statistically significant relationship despite apparent variability.

Lagged correlation analysis further revealed a temporal offset between sap transport and leaf hydration dynamics. The correlation peaked at approximately 4.5 hours when sap flow was shifted forward relative to impedance, indicating that increases in sap flow precede decreases in

270 leaf impedance (Figure S19). This delay is consistent with the time required for water transported  
271 through the xylem to redistribute into leaf tissues and restore cellular hydration. Multiple lag  
272 processes coexist in plant water transport. Sap flux is known to lag environmental drivers such as  
273 radiation and vapor pressure deficit<sup>21,22</sup>, while leaf hydration reflects a later stage of the hydraulic  
274 pathway. The observed delay between sap transport and impedance therefore supports the  
275 interpretation that impedance measurements capture tissue-level hydration dynamics rather than  
276 immediate hydraulic flow.

277           Together, these observations demonstrate that leaf impedance dynamics are hydraulically  
278 coupled to stem sap transport and reflect downstream redistribution of water within plant tissues.

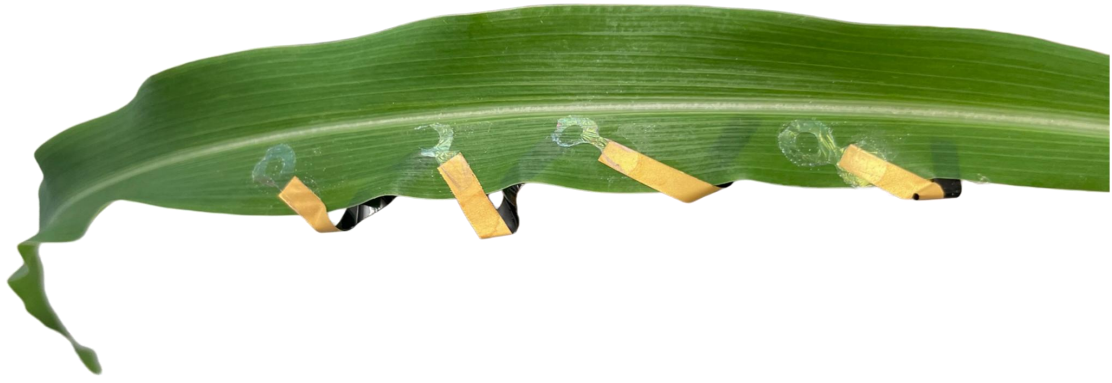

279

280 **Figure S1. FGS conformally attached to a corn leaf.** Photograph showing four FGS  
281 conformally attached to the adaxial side (top) of a single corn leaf, forming the sensing interface.  
282 Gold tape serves as electrical interconnects, and external wires (routed on the backside and not  
283 visible) complete the measurement setup.

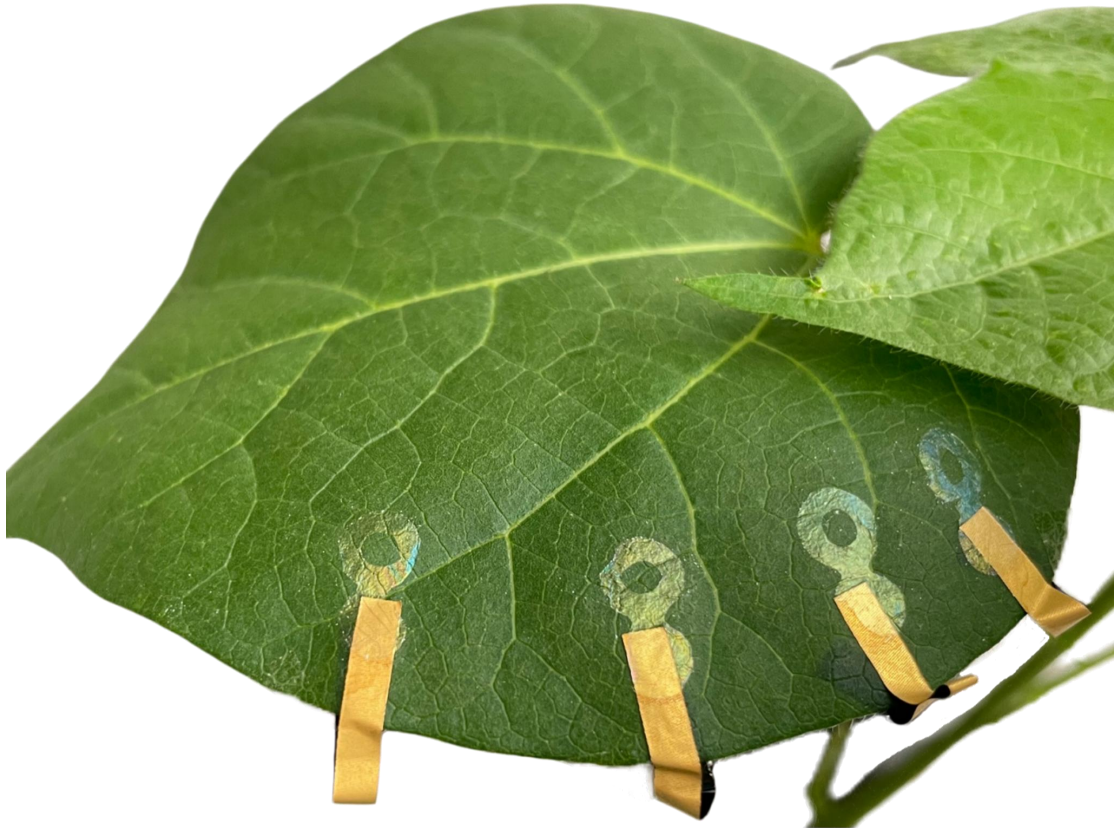

284  
285  
286  
287

**Figure S2. FGS attached on a cotton leaf.** The sensing configuration shown in Figure S1 is applied to a cotton leaf. Four FGS are attached to the leaf surface and connected via gold adhesive tape to external wiring on the reverse side.

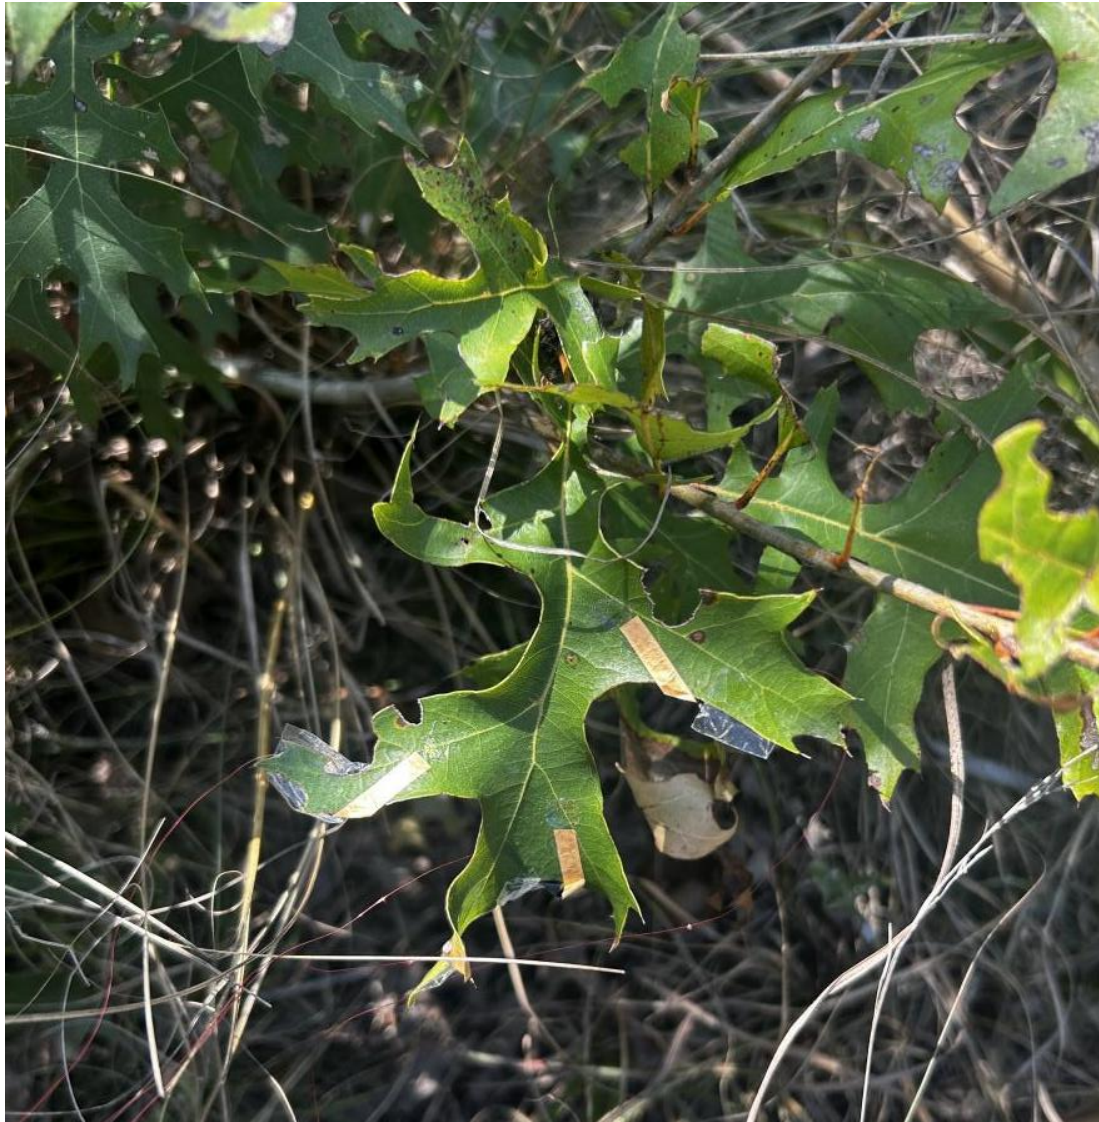

288

289 **Figure S3. FGS attached to a red oak (*Quercus buckleyi*) leaf under natural outdoor**

290 **conditions.** Four FGS are conformally attached to the leaf surface and connected to external

291 wiring using gold tape, following the sensing configuration shown in Figure S1.

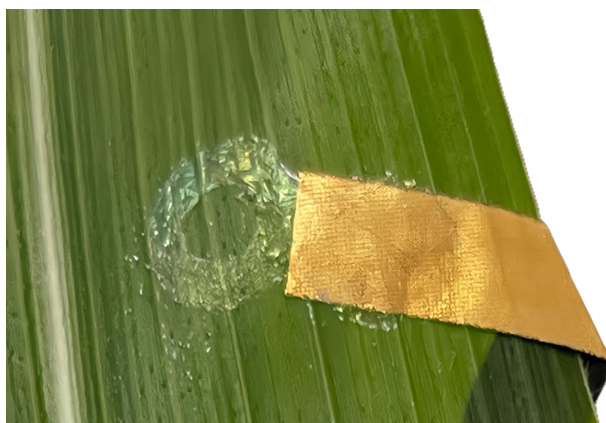

292

293 **Figure S4. A single FGS electrode and its electrical interconnect.** Photograph showing a single  
294 FGS unit and its gold tape interconnect. The left region of the graphene film contacts the leaf  
295 surface, while the right region overlaps the gold tape to form the electrical interconnect.

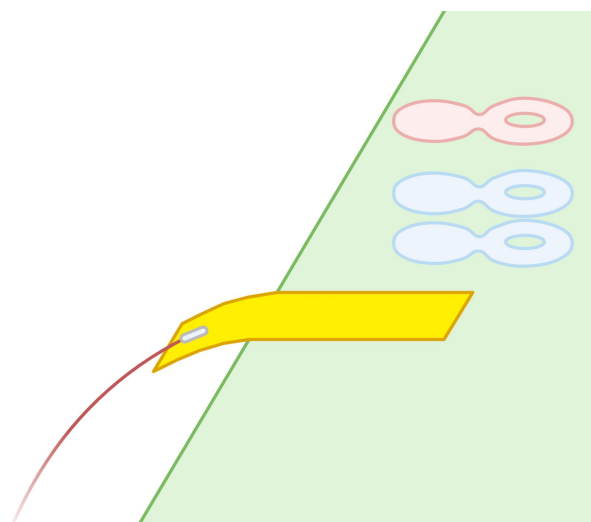

296

297 **Figure S5. FGS architecture and measurement configuration.** Schematic illustration of the

298 sensing structure and measurement setup. Pink represents the PMMA supporting layer; blue

299 indicates monolayer graphene; gold corresponds to gold tape; silver denotes silver epoxy; red lines

300 represent enameled copper wires; and green indicates the leaf surface.

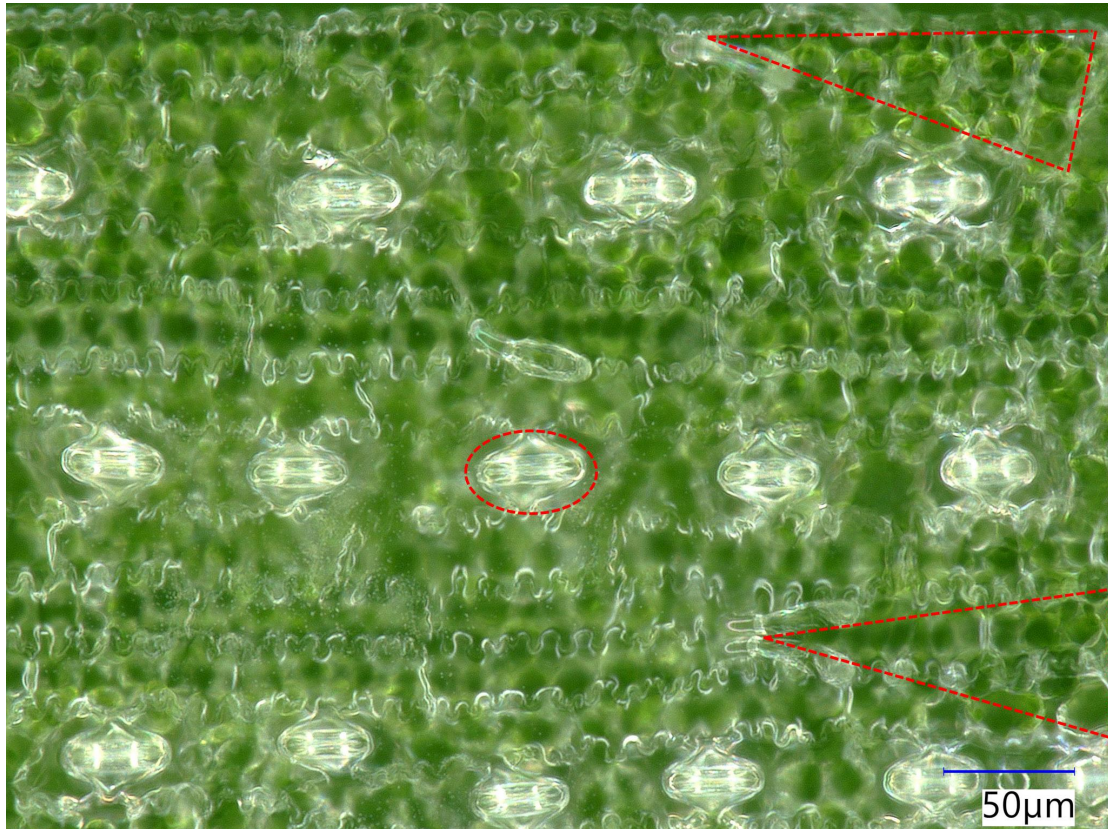

301  
302  
303  
304  
305  
306  
307  
308

**Figure S6. Microporous structure of the FGS.** Optical micrograph (VHX-X1, Keyence) of an FGS attached to the leaf surface. Triangular micropores in the graphene are outlined with red dashed lines, and a native stomatal pore of the leaf is marked with a red dashed ellipse. Although the graphene micropores do not always align perfectly with the stomata (as shown here), their high density ensures sufficient proximity to allow gas molecules to diffuse through the interfacial gap between the graphene and the leaf surface and enter the micropores, thereby maintaining gas exchange.

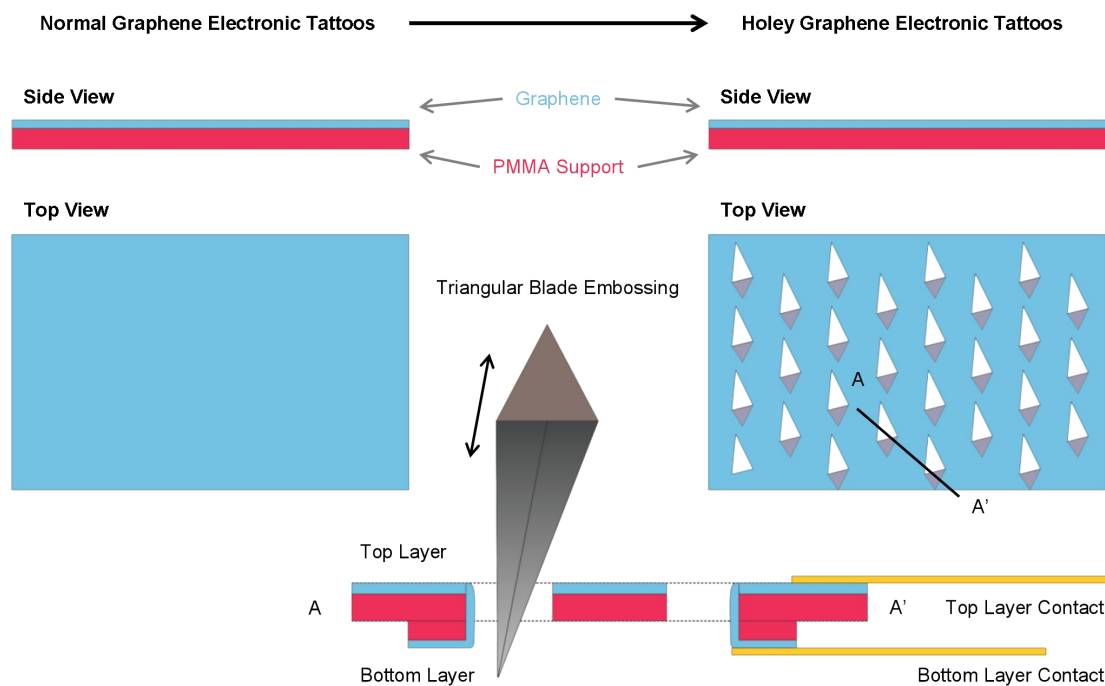

309

310 **Figure S7. Formation of triangular micropores on graphene via embossing.** The  
 311 graphene/PMMA is embossed using a Silhouette Cameo cutter. Because the process involves  
 312 embossing rather than cutting, the pressed regions adhere to the back side of the film, partially  
 313 delaminating the graphene and exposing a larger graphene area on the PMMA side. This creates  
 314 triangular micropores on the graphene surface and enables electrical access to the FGS not only  
 315 from the top (graphene) surface but also from the bottom (PMMA) side. The detailed fabrication  
 316 process and electrical characterization of this method have been reported previously<sup>23</sup>.

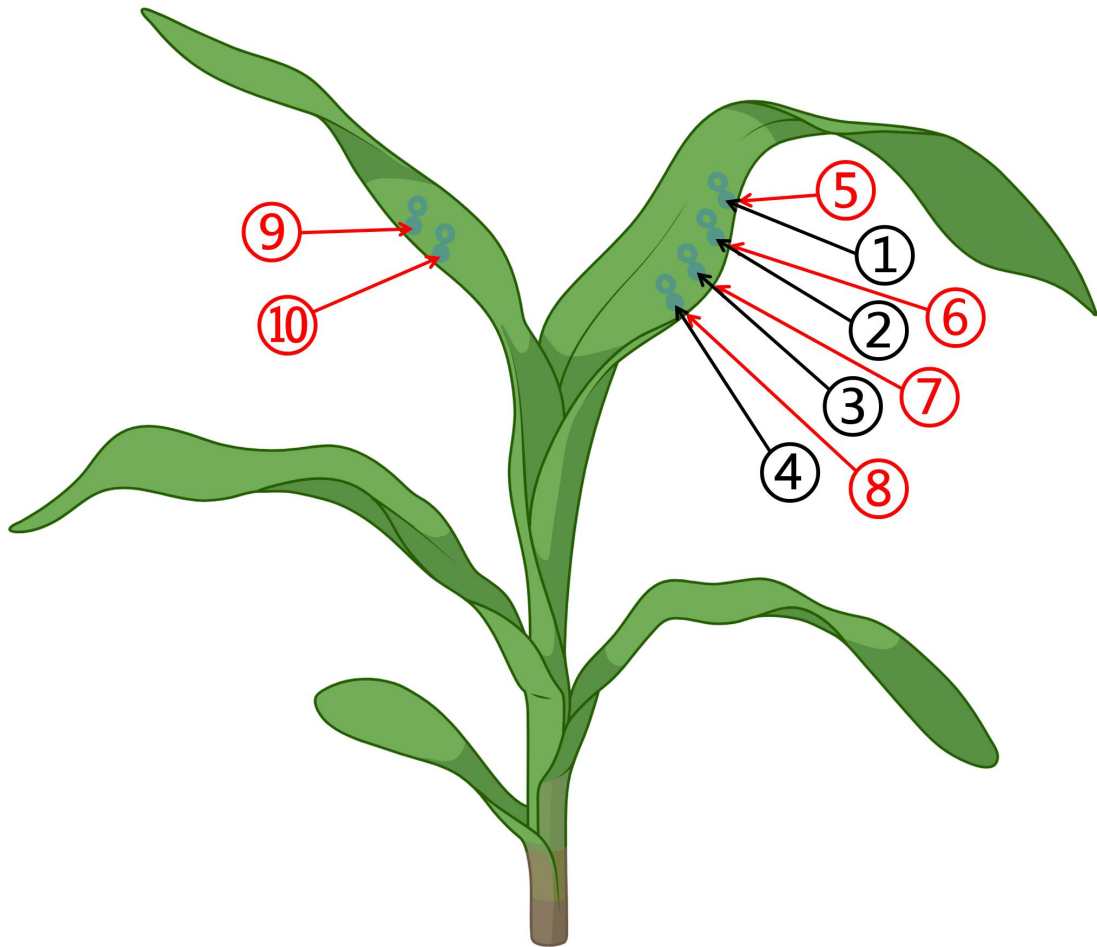

317

318 **Figure S8. Placement of FGS on corn leaves.** Black arrows and numbers indicate sensors  
319 positioned on the adaxial leaf surface, while red arrows and numbers indicate sensors on the  
320 abaxial surface. Sensors 1–4 are placed on the adaxial surface (top), and sensors 5–8 are placed on  
321 the abaxial surface (bottom). Sensors 2, 3, 6, and 7 placed on opposite surfaces of the same leaf  
322 (across), whereas sensors 6, 7, 9, and 10 are placed on different leaves to measure (between).

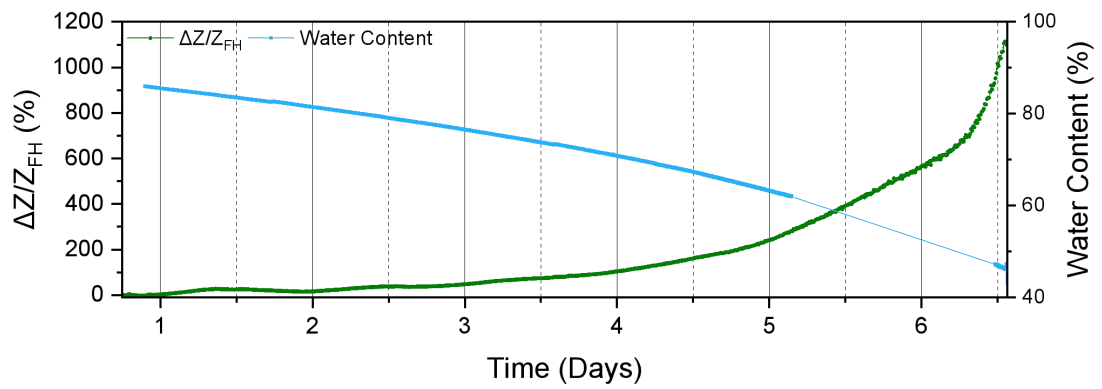

323

324 **Figure S9. Correlation between LWC and impedance.** A detached corn leaf was continuously  
 325 monitored for impedance and weight loss over time. LWC was determined gravimetrically from  
 326 the fresh and dry weight. Solid vertical lines indicate midnight, dash vertical lines indicate noon.

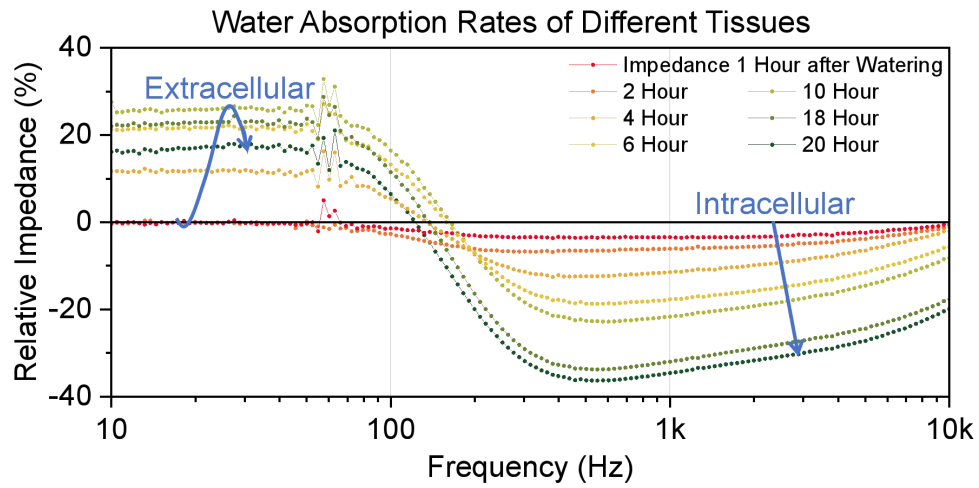

327  
 328 **Figure S10. Frequency-dependent impedance dynamics during water uptake.** Within 20  
 329 hours following irrigation, relative impedance ( $\Delta Z/Z_0$ ) changes vary across frequencies, indicating  
 330 differential water uptake dynamics among leaf extracellular and intracellular compartments.

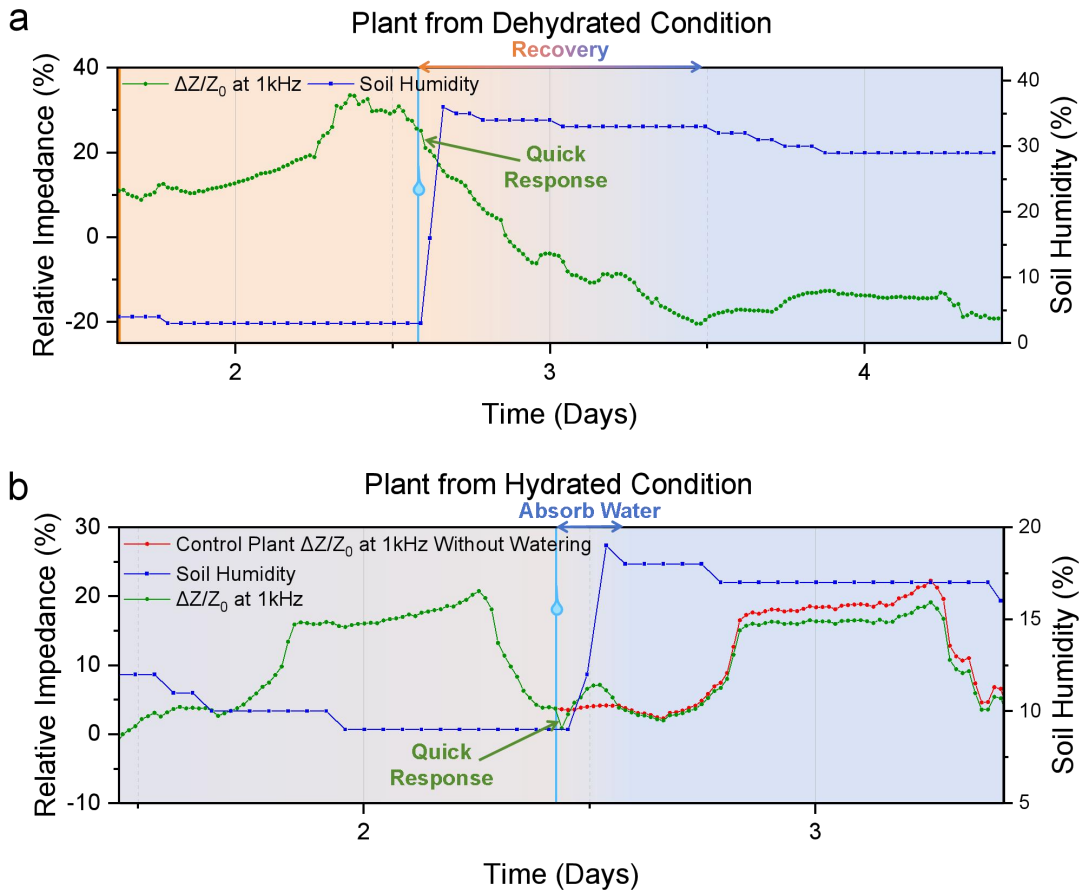

331  
 332  
 333  
 334  
 335  
 336  
 337  
 338  
 339  
 340  
 341  
 342

**Figure S11. Long-term dynamic monitoring of leaf impedance under different hydration states.** **a**, Close-up view of Figure 2c showing the 24 h preceding and 48 h following an irrigation event. A rapid impedance decrease occurs immediately after irrigation, followed by approximately one day of recovery. The water drop icon indicates the irrigation event, and orange vertical lines denote visually observable water stress (leaf curling). Semi-transparent orange and blue shading represent periods of water stress and full hydration, respectively. **b**, Leaf impedance and soil humidity under hydrated conditions. Water absorption persists for approximately 5 hours following irrigation. The red curve represents a non-irrigated control plant. Because the two datasets originate from different plants, baseline impedance values differ. For visual comparison, a constant offset was applied to the control curve beginning at the irrigation time to align baselines; this adjustment does not affect the temporal response dynamics.

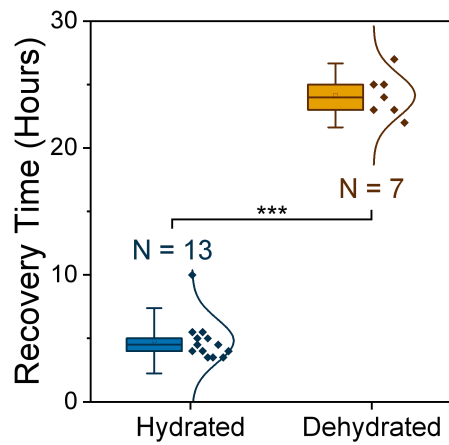

343

344 **Figure S12. Comparison of recovery times under hydrated and drought-stressed conditions.**

345 Recovery time was defined as the interval between irrigation and impedance return to baseline.

346 Hydrated plants (N = 13) recovered significantly faster than drought-stressed plants (N = 7). The

347 difference in recovery time was statistically significant ( $p = 5.05 \times 10^{-12}$ ).

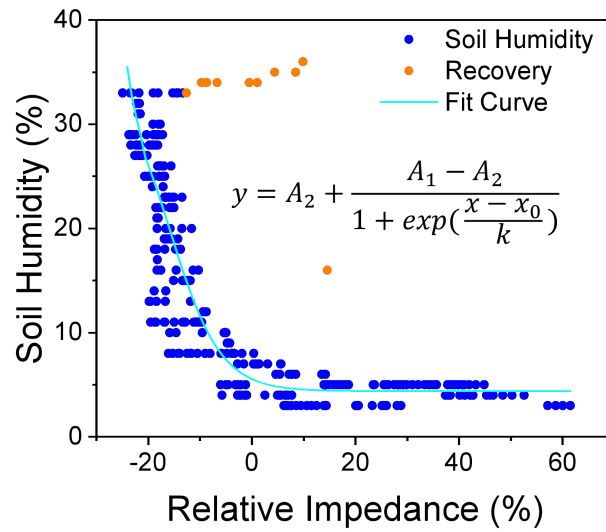

348

349 **Figure S13. Relationship between leaf impedance and soil humidity.** Orange points indicate  
 350 the active recovery phase during water uptake, while blue points represent steady-state conditions.

351 Recovery-phase data were excluded from curve fitting to avoid bias from transient dynamics. A

352 logistic fit captures the nonlinear relationship between soil moisture and leaf hydration state.

353 Logistic model parameters:  $A_1 = 4.388$ ,  $A_2 = 35.335$ ,  $x_0 = -15.832$ ,  $k = -4.879$ .

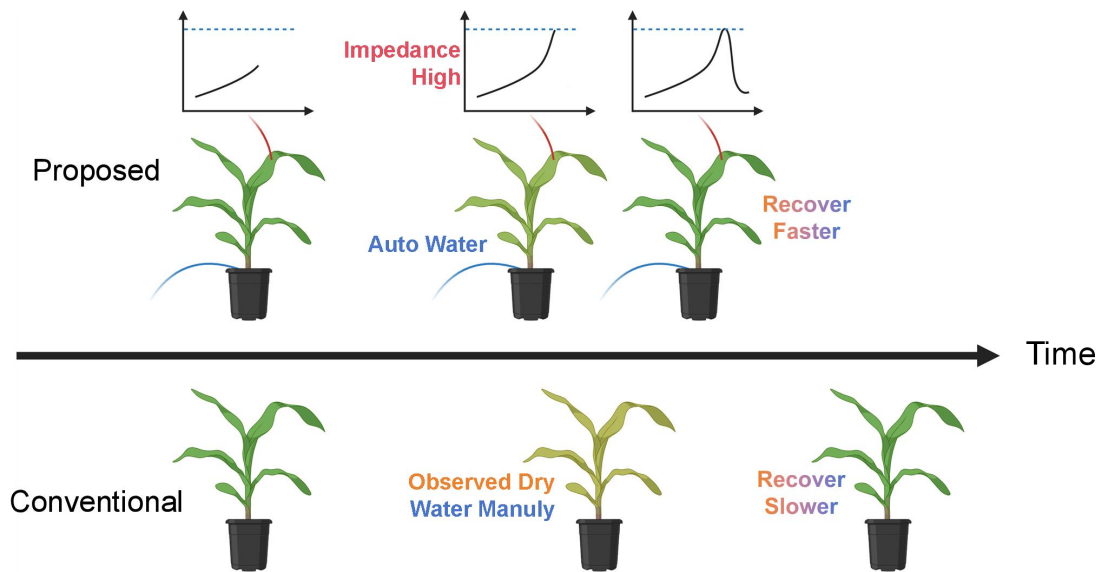

354

355 **Figure S14. Conceptual illustration of irrigation management enabled by impedance**  
 356 **monitoring.** In the upper diagram, crops are equipped with FGS linked to an automated irrigation  
 357 system. When impedance rises beyond a threshold, indicating early signs of dehydration, water is  
 358 delivered preemptively, allowing for faster recovery. In contrast, the lower diagram shows  
 359 conventional practice in which irrigation is performed after visible leaf curling, indicating more  
 360 severe dehydration and resulting in slower recovery.

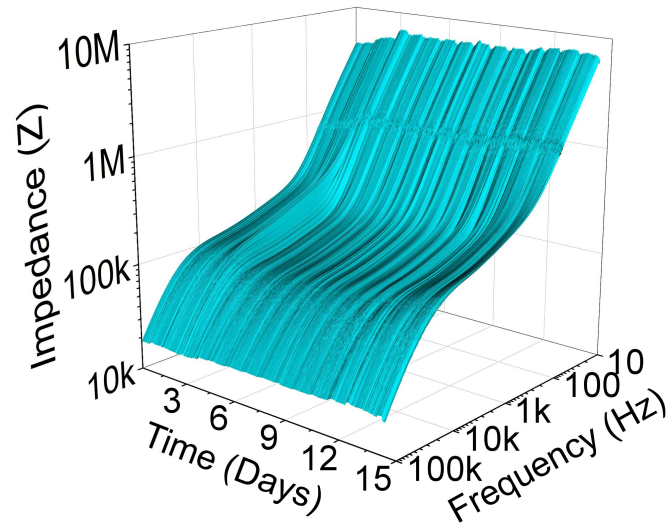

361

362 **Figure S15. Continuous impedance monitoring across the large frequency range (10 Hz–100**  
363 **kHz) over 14 days.**

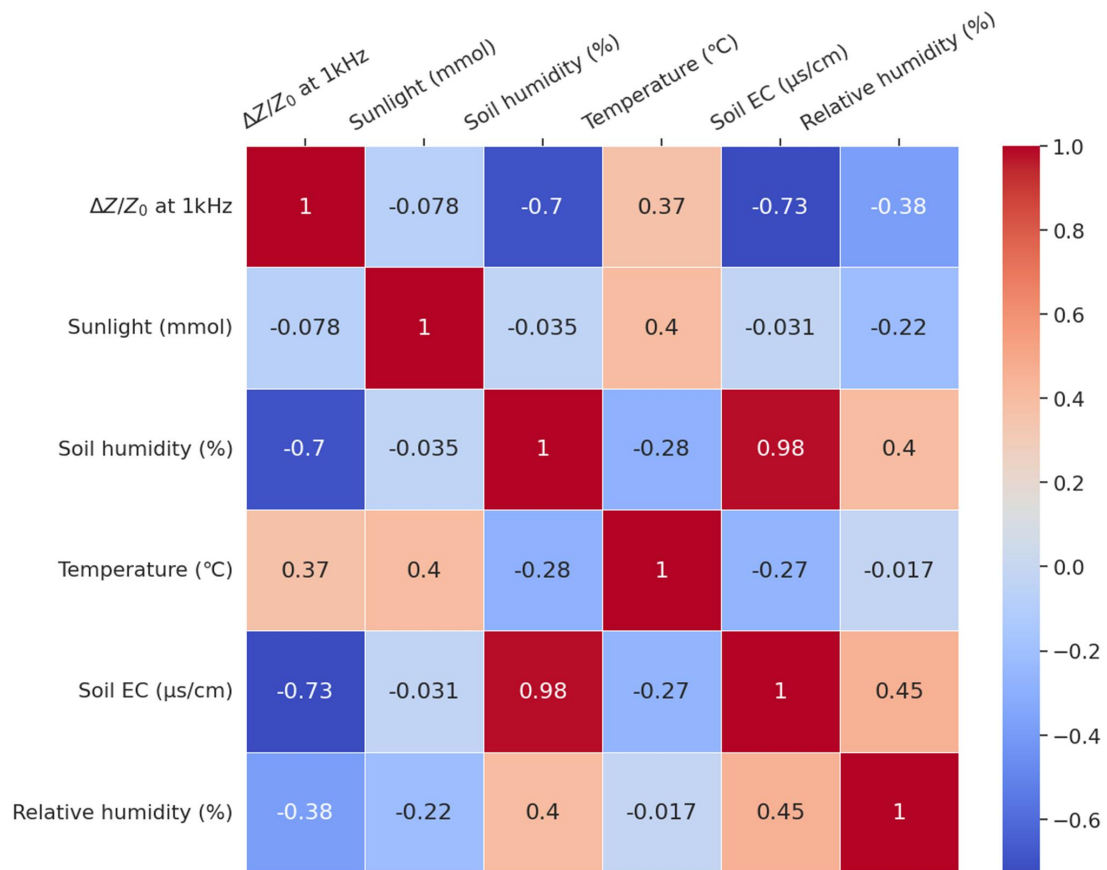

364

365 **Figure S16. Correlation heatmap between leaf impedance and environmental parameters.**  
 366 Pearson correlation coefficients quantify linear associations among impedance ( $\Delta Z/Z_0$  at 1 kHz),  
 367 sunlight intensity, soil humidity, temperature, soil electrical conductivity (EC), and relative  
 368 humidity. Coefficients greater than 0.5 are indicative of strong positive relationships, whereas  
 369 values below -0.5 are indicative of strong negative relationships.

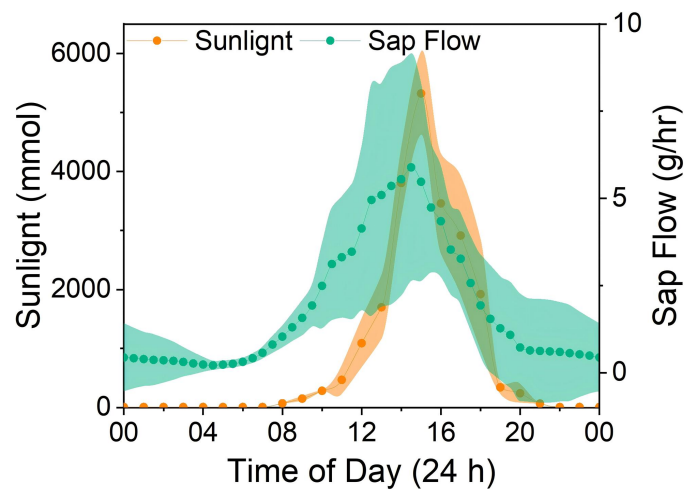

370

371 **Figure S17. Diurnal patterns of sunlight intensity and sap flow.** Twenty-day averaged 24-hour  
 372 profiles show strong alignment between sap flow and sunlight intensity. Solid lines represent  
 373 means, and semitransparent regions represent  $\pm$  standard deviation (SD).

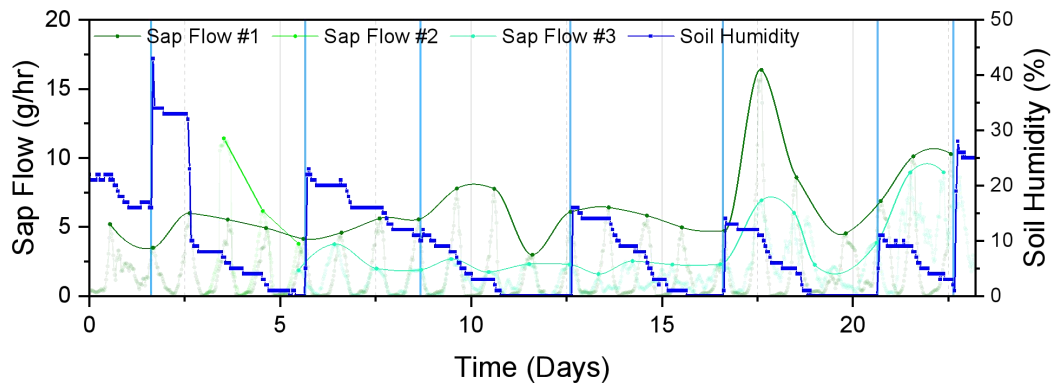

374

375 **Figure S18. Sap flow response to irrigation events.** Semi-transparent green curves show  
 376 real-time sap flow, while solid green lines indicate daily peak values. Light blue vertical lines  
 377 denote irrigation timing. Sap flow increases typically occur on the following day, indicating  
 378 delayed hydraulic adjustment.

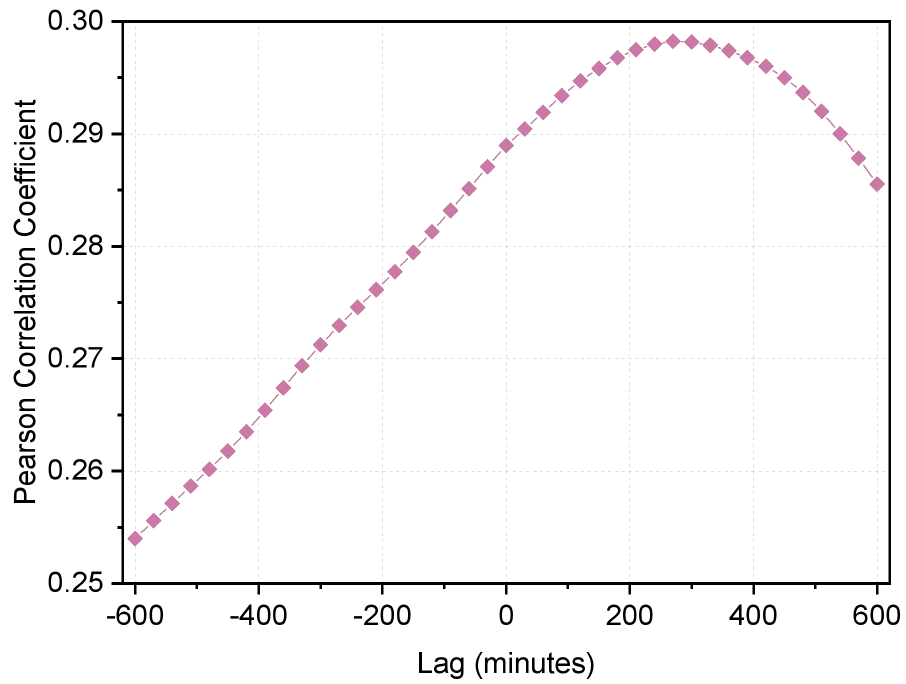

379  
380 **Figure S19. Lagged correlation between sap flow and leaf impedance.** Pearson correlation  
381 coefficients ( $r$ ) between sap flow and impedance are plotted for lag times from -600 to +600  
382 minutes. Positive lag values indicate sap flow shifted forward in time. The peak correlation at  $\sim 4.5$   
383 hours indicates that increases in sap flow precede decreases in impedance.

384 **Table S1. Examples of emerging plant hydration monitoring sensors.**

| <i>Study Reference</i> | <i>Measured Quantity</i>   | <i>Measurement Method</i> | <i>Sensor Materials</i> | <i>Sensor Thickness</i> | <i>Sensor Weight</i> | <i>Invasiveness</i> | <i>Continuous Monitoring Duration</i> |
|------------------------|----------------------------|---------------------------|-------------------------|-------------------------|----------------------|---------------------|---------------------------------------|
| <i>This Work</i>       | Intra-/Extracellular LWC   | 4-Probe Impedance         | 2 Layer Graphene        | < 300 nm                | < 0.1 mg             | Non-Invasive        | 16 Days                               |
| 11                     | LWC                        | 4-Probe Impedance         | Aluminum Foil           | --                      | --                   | Invasive            | 2 Days                                |
| 7                      | Leaf Surface RH            | DC Resistance             | LIG                     | --                      | --                   | Invasive            | 16 Days                               |
| 24                     | Leaf Surface RH            | Capacitance               | LIG and GO              | --                      | --                   | Invasive            | 11 Days                               |
| 25                     | Leaf Electrical Potential  | Capacitance               | Polymer + CNT           | 50 um                   | --                   | Non-Invasive        | 1 Month                               |
| 5                      | Leaf Surface PWC and RH    | 2-Probe Impedance         | GO                      | --                      | --                   | Invasive            | 4000 Seconds                          |
| 6                      | Leaf Surface RH            | DC Resistance             | GO                      | --                      | --                   | Invasive            | Yes                                   |
| 30                     | Leaf Hydration             | Conductance               | Graphene                | < 0.3 um                | 9 mg                 | Non-Invasive        | 8 Days                                |
| 26                     | Leaf Surface RH            | Voltage                   | GO                      | 10 um                   | --                   | Invasive            | No                                    |
| 9                      | LWC                        | THz Waves                 | --                      | --                      | --                   | Non-Invasive        | --                                    |
| 8                      | LWC                        | THz Waves                 | --                      | --                      | --                   | Non-Invasive        | --                                    |
| 27                     | Sap Flow Rate              | Temperature               | Cu/Pt                   | --                      | 240 mg               | Non-Invasive        | 16 Days                               |
| 28                     | Leaf Surface Water Content | 2-Probe Impedance         | Cu/SWCNT                | 30 um                   | 17 mg                | Non-Invasive        | 1 Day                                 |
| 29                     | Electrophysiology          | 2-Probe Impedance         | EPC Thermogel           | 1 mm                    | --                   | Non-Invasive        | --                                    |

385

386

### Supplementary Methods: Statistical Analysis

387           Statistical analyses were performed in Python using SciPy and statsmodels. Sample sizes  
388 (N) refer to independent biological replicates and are reported in figure legends.

389           Statistical comparisons between two independent groups were performed using Welch's  
390 two-tailed t-test, which does not assume equal variances. Statistical significance was defined at  $\alpha$   
391 = 0.05. p-values  $\geq 0.001$  are reported exactly; values  $< 0.001$  are reported as  $p < 0.001$ . Graphical  
392 annotations use the following convention: \* ( $p < 0.05$ ), \*\* ( $p < 0.01$ ), \*\*\* ( $p < 0.001$ ), and n.s.  
393 (not significant) for  $p \geq 0.05$ .

394 **Supplementary References**

395

396 1. Zeng, S. *et al.* Ultrafast response of self-powered humidity sensor of flexible graphene oxide  
397 film. *Mater. Des.* **226**, 111683 (2023).

398 2. Lu, Y. *et al.* Multimodal Plant Healthcare Flexible Sensor System. *ACS Nano* **14**, 10966–10975  
399 (2020).

400 3. Lan, L. *et al.* One-step and large-scale fabrication of flexible and wearable humidity sensor  
401 based on laser-induced graphene for real-time tracking of plant transpiration at bio-interface.  
402 *Biosens. Bioelectron.* **165**, 112360 (2020).

403 4. Electrical and humidity-sensing properties of reduced graphene oxide thin film fabricated by  
404 layer-by-layer with covalent anchoring on flexible substrate - ScienceDirect.  
405 <https://www.sciencedirect.com/science/article/pii/S0925400514004365?pes=vor#bib0225>.

406 5. Li, D., Li, G., Li, J. & Xu, S. Wearable Crop Sensor Based on Nano-Graphene Oxide for  
407 Noninvasive Real-Time Monitoring of Plant Water. *Membranes* **12**, 358 (2022).

408 6. Oren, S., Ceylan, H., Schnable, P. S. & Dong, L. High-Resolution Patterning and Transferring of  
409 Graphene-Based Nanomaterials onto Tape toward Roll-to-Roll Production of Tape-Based  
410 Wearable Sensors. *Adv. Mater. Technol.* **2**, 1700223 (2017).

411 7. Yin, S., Ibrahim, H., Schnable, P. S., Castellano, M. J. & Dong, L. A Field-Deployable, Wearable  
412 Leaf Sensor for Continuous Monitoring of Vapor-Pressure Deficit. *Adv. Mater. Technol.* **6**, 2001246  
413 (2021).

414 8. Baldacci, L. *et al.* Non-invasive absolute measurement of leaf water content using terahertz  
415 quantum cascade lasers. *Plant Methods* **13**, 51 (2017).

416 9. Li, R., Lu, Y., Peters, J. M. R., Choat, B. & Lee, A. J. Non-invasive measurement of leaf water  
417 content and pressure–volume curves using terahertz radiation. *Sci. Rep.* **10**, 21028 (2020).

418 10. Miccoli, I., Edler, F., Pfnür, H. & Tegenkamp, C. The 100th anniversary of the four-point probe  
419 technique: the role of probe geometries in isotropic and anisotropic systems. *J. Phys. Condens.*  
420 *Matter* **27**, 223201 (2015).

421 11. Serrano-Finetti, E., Castillo, E., Alejos, S. & León Hilario, L. M. Toward noninvasive monitoring  
422 of plant leaf water content by electrical impedance spectroscopy. *Comput. Electron. Agric.* **210**,  
423 107907 (2023).

424 12. Scoffoni, C. *et al.* The Causes of Leaf Hydraulic Vulnerability and Its Influence on Gas  
425 Exchange in *Arabidopsis thaliana*[OPEN]. *Plant Physiol.* **178**, 1584–1601 (2018).

426 13. Blackman, C. J., Brodribb, T. J. & Jordan, G. J. Leaf hydraulics and drought stress: response,  
427 recovery and survivorship in four woody temperate plant species. *Plant Cell Environ.* **32**,  
428 1584–1595 (2009).

429 14. Brodribb, T. J. & Cochard, H. Hydraulic Failure Defines the Recovery and Point of Death in  
430 Water-Stressed Conifers. *Plant Physiol.* **149**, 575–584 (2009).

431 15. Abid, M. *et al.* Improved tolerance to post-anthesis drought stress by pre-drought priming at  
432 vegetative stages in drought-tolerant and -sensitive wheat cultivars. *Plant Physiol. Biochem.* **106**,  
433 218–227 (2016).

434 16. Caldeira, C. F. *et al.* A Hydraulic Model Is Compatible with Rapid Changes in Leaf Elongation  
435 under Fluctuating Evaporative Demand and Soil Water Status. *Plant Physiol.* **164**, 1718–1730  
436 (2014).

437 17. MEASUREMENT OF SAP FLOW DYNAMICS THROUGH THE TOMATO PEDUNCLE USING A

438 NON-INVASIVE SENSOR BASED ON THE HEAT FIELD DEFORMATION METHOD | International  
439 Society for Horticultural Science. [http://www.actahort.org/books/991/991\\_50.htm](http://www.actahort.org/books/991/991_50.htm).

440 18. Nadezhkina, N., Vandegehuchte, M. W. & Steppe, K. Sap flux density measurements based  
441 on the heat field deformation method. *Trees* **26**, 1439–1448 (2012).

442 19. Schreel, J. D. M., Van de Wal, B. A. E., Hervé-Fernandez, P., Boeckx, P. & Steppe, K. Hydraulic  
443 redistribution of foliar absorbed water causes turgor-driven growth in mangrove seedlings. *Plant*  
444 *Cell Environ.* **42**, 2437–2447 (2019).

445 20. Vandegehuchte, M. W. & Steppe, K. Sapflow+: a four-needle heat-pulse sap flow sensor  
446 enabling nonempirical sap flux density and water content measurements. *New Phytol.* **196**,  
447 306–317 (2012).

448 21. Schäfer, K. V. R., Oren, R. & Tenhunen, J. D. The effect of tree height on crown level stomatal  
449 conductance. *Plant Cell Environ.* **23**, 365–375 (2000).

450 22. Phillips, N., Nagchaudhuri, A., Oren, R. & Katul, G. Time constant for water transport in  
451 loblolly pine trees estimated from time series of evaporative demand and stem sapflow. *Trees* **11**,  
452 412–419 (1997).

453 23. Kireev, D., Kampfe, J., Hall, A. & Akinwande, D. Graphene electronic tattoos 2.0 with  
454 enhanced performance, breathability and robustness. *Npj 2D Mater. Appl.* **6**, 46 (2022).

455 24. Lan, L. *et al.* One-step and large-scale fabrication of flexible and wearable humidity sensor  
456 based on laser-induced graphene for real-time tracking of plant transpiration at bio-interface.  
457 *Biosens. Bioelectron.* **165**, 112360 (2020).

458 25. Wong, Y. J. *et al.* Adaptable thermoresponsive polymer for long-term electrical coupling in  
459 plant electrophysiology monitoring. *Sci. Adv.* **12**, eady1400 (2026).

460 26. Zeng, S. *et al.* Ultrafast response of self-powered humidity sensor of flexible graphene oxide  
461 film. *Mater. Des.* **226**, 111683 (2023).

462 27. Cohabiting Plant-Wearable Sensor In Situ Monitors Water Transport in Plant - Chai - 2021 -  
463 Advanced Science - Wiley Online Library.  
464 <https://advanced.onlinelibrary.wiley.com/doi/10.1002/adv.202003642>.

465 28. Zhao, Y. *et al.* Multifunctional Stretchable Sensors for Continuous Monitoring of Long-Term  
466 Leaf Physiology and Microclimate. *ACS Omega* **4**, 9522–9530 (2019).

467 29. Luo, Y. *et al.* A Morphable Ionic Electrode Based on Thermogel for Non-Invasive Hairy Plant  
468 Electrophysiology. *Adv. Mater.* **33**, 2007848 (2021).

469 30. Misra, U. *et al.* Graphene In-Sensor Compute Device for Plant Hydration Monitoring. *Nano*  
470 *Lett.* **26**, 2432–2440 (2026).

471
